# Supplementary material for: Theoretical insights on tunable optoelectronics and charge mobilities in cyano-perylenediimides: interplays between –CN numbers and positions
Source: Royal Society of Chemistry journal article supplement (doi:10.1039/d1cp01473k), 2021-01-01
Supplement: d1cp01473k1.pdf [file d1cp01473k1.pdf]

## Supplementary Materials for

### Theoretical Insights on Tunable Optoelectronics and Charge Mobilities in Cyano-Perylenediimides: Interplays between -CN Numbers and Positions

Raka Ahmed and Arun K Manna\*

Department of Chemistry and Center for Atomic, Molecular and Optical Sciences & Technologies, Indian Institute of Technology Tirupati, Tirupati, A.P 517506

\*Corresponding Author E-mail: arun@iittp.ac.in

**Table S1:** Molecular dipole moments ( $\mu$ , in Debye), HOMO ( $E_H$ ) and LUMO ( $E_L$ ) energies along with Mülliken electronegativity  $\chi = -\frac{1}{2}(E_H + E_L)$  calculated using OT-RSH/6-311G (d, p) are listed in eV unit and also the percentage contribution of -CN to the HOMO and the LUMO orbitals of different PDI monomers considered in this study.

| Monomers                 | $\mu$ | $E_H$ | $E_L$ | $\chi$ | % of -CN Group |      |
|--------------------------|-------|-------|-------|--------|----------------|------|
|                          |       |       |       |        | HOMO           | LUMO |
| Pristine-PDI             | 0.00  | -7.78 | -2.34 | 5.06   | 0              | 0    |
| PDI-(CN) <sub>2</sub> -a | 1.98  | -8.37 | -3.00 | 5.69   | 4.32           | 4.48 |
| PDI-(CN) <sub>2</sub> -b | 0.00  | -8.34 | -3.00 | 5.67   | 0.57           | 2.51 |
| PDI-(CN) <sub>4</sub> -a | 0.00  | -8.87 | -3.60 | 6.23   | 1.23           | 4.49 |
| PDI-(CN) <sub>4</sub> -b | 4.05  | -8.83 | -3.49 | 6.16   | 6.35           | 4.59 |

**Table S2:** Calculated HOMO ( $E_H$ ), LUMO ( $E_L$ ) energies and the HOMO-LUMO gap ( $\Delta E_{H-L}$ ) for all the PDI monomers using OT-RSH, OT-SRSH and OT-SRSH+PCM method with 6-311G (d, p) basis set. All energies are in eV.

| Monomer                  | OT-RSH |       |                  | OT-SRSH |       |                  | OT-SRSH+PCM |       |                  |
|--------------------------|--------|-------|------------------|---------|-------|------------------|-------------|-------|------------------|
|                          | $E_H$  | $E_L$ | $\Delta E_{H-L}$ | $E_H$   | $E_L$ | $\Delta E_{H-L}$ | $E_H$       | $E_L$ | $\Delta E_{H-L}$ |
| Pristine-PDI             | -7.78  | -2.34 | 5.44             | -4.68   | -1.89 | 2.79             | -4.52       | -1.74 | 2.78             |
| PDI-(CN) <sub>2</sub> -a | -8.37  | -3.00 | 5.37             | -5.41   | -2.59 | 2.82             | -5.14       | -2.32 | 2.82             |
| PDI-(CN) <sub>2</sub> -b | -8.34  | -3.00 | 5.34             | -5.34   | -2.58 | 2.76             | -4.99       | -2.27 | 2.72             |
| PDI-(CN) <sub>4</sub> -a | -8.87  | -3.60 | 5.27             | -6.05   | -3.23 | 2.82             | -5.55       | -2.78 | 2.77             |
| PDI-(CN) <sub>4</sub> -b | -8.83  | -3.49 | 5.34             | -5.90   | -3.11 | 2.79             | -5.50       | -2.71 | 2.79             |

**Table S3:** Isotropic polarizability ( $\alpha_{iso}$ ), molecular volume ( $V_m$ ) and scalar dielectric constant ( $\epsilon_s$ ) for all gas-phase PDI molecules calculated using OT-RSH/6-311++G (d, p). The first

singlet excited-state  $S_1$  (optically bright and intense one characterized by large oscillator strength given in parentheses) calculated with different functionals (OT-RSH, OT-SRSH and OT-SRSH+PCM) are also tabulated for all functional PDI monomers.

| Molecule                 | $\alpha_{iso}$<br>(a.u.) | $V_m$<br>(a.u.) | $\epsilon_s$ | $S_1$ State Energy (eV) |             |                  |
|--------------------------|--------------------------|-----------------|--------------|-------------------------|-------------|------------------|
|                          |                          |                 |              | OT-RSH                  | OT-SRSH     | OT-SRSH<br>+ PCM |
| Pristine-PDI             | 348.263                  | 2770.009        | 4.34         | 2.77 (0.70)             | 2.54 (0.62) | 2.35 (0.92)      |
| PDI-(CN) <sub>2</sub> -a | 379.948                  | 3096.227        | 4.17         | 2.71 (0.57)             | 2.50 (0.50) | 2.34 (0.75)      |
| PDI-(CN) <sub>2</sub> -b | 388.220                  | 2988.549        | 4.58         | 2.75 (0.65)             | 2.53 (0.58) | 2.33 (0.87)      |
| PDI-(CN) <sub>4</sub> -a | 428.959                  | 3436.355        | 4.29         | 2.75 (0.62)             | 2.54 (0.55) | 2.33 (0.83)      |
| PDI-(CN) <sub>4</sub> -b | 415.412                  | 3187.883        | 4.61         | 2.72 (0.51)             | 2.49 (0.45) | 2.35 (0.70)      |

**Table S4:** The calculated 0-0 energy ( $E_{0-0} = E_{vert.} - \Delta ZPVE - \lambda_{S_1}$ ), the difference in ZPVE ( $\Delta ZPVE$ ) and the  $S_1$  state relaxation energy ( $\lambda_{S_1}$ ) for all PDI monomers calculated in the condensed-phase using OT-RSH+PCM and OT-SRSH+PCM. The  $E_{vert.}$  indicates the vertical excitation energy for the  $S_1$  state. The ZPVE energies for  $S_0$  and  $S_1$  states are obtained using  $\omega$ B97X-D+PCM. All energies are listed in eV.

| Molecule                 | $E_{0-0}$      |                 | $\Delta ZPVE =$<br>$E(S_0) - E(S_1)$ | $\lambda_{S_1}$ |                 |
|--------------------------|----------------|-----------------|--------------------------------------|-----------------|-----------------|
|                          | OT-RSH<br>+PCM | OT-SRSH<br>+PCM |                                      | OT-RSH<br>+PCM  | OT-SRSH<br>+PCM |
| Pristine-PDI             | 2.28           | 2.14            | 0.07                                 | 0.21            | 0.13            |
| PDI-(CN) <sub>2</sub> -a | 2.28           | 2.14            | 0.05                                 | 0.22            | 0.14            |
| PDI-(CN) <sub>2</sub> -b | 2.25           | 2.12            | 0.08                                 | 0.21            | 0.12            |
| PDI-(CN) <sub>4</sub> -a | 2.26           | 2.13            | 0.08                                 | 0.20            | 0.12            |
| PDI-(CN) <sub>4</sub> -b | 2.30           | 2.16            | 0.05                                 | 0.22            | 0.14            |

**Table S5:** Calculated HOMO ( $E_H$ ), LUMO ( $E_L$ ) energies and the HOMO-LUMO gap ( $\Delta E_{H-L}$ ) for all functional PDI dimers using OT-RSH/6-311G (d, p). Low-lying four singlet excited-state energies are also provided. Oscillator strengths are listed within the bracket. All energies are in eV.

| Dimers       | $E_H$ | $E_L$ | $\Delta E_{H-L}$ | $S_1$          | $S_2$          | $S_3$          | $S_4$          |
|--------------|-------|-------|------------------|----------------|----------------|----------------|----------------|
| Pristine-PDI | -7.64 | -2.62 | 5.02             | 2.39<br>(0.02) | 2.61<br>(0.05) | 2.77<br>(0.03) | 2.81<br>(0.86) |

|                               |       |       |      |                |                |                |                |
|-------------------------------|-------|-------|------|----------------|----------------|----------------|----------------|
| PDI-(CN) <sub>2</sub> -a (d1) | -8.33 | -3.38 | 4.95 | 2.41<br>(0.02) | 2.53<br>(0.04) | 2.67<br>(0.21) | 2.73<br>(0.49) |
| PDI-(CN) <sub>2</sub> -a (d2) | -8.19 | -3.38 | 4.81 | 2.26<br>(0.04) | 2.54<br>(0.10) | 2.71<br>(0.49) | 2.82<br>(0.07) |
| PDI-(CN) <sub>2</sub> -b (d1) | -8.30 | -3.44 | 4.86 | 2.32<br>(0.02) | 2.58<br>(0.07) | 2.80<br>(0.72) | 2.82<br>(0.05) |
| PDI-(CN) <sub>2</sub> -b (d2) | -8.38 | -3.42 | 4.96 | 2.43<br>(0.02) | 2.57<br>(0.07) | 2.69<br>(0.02) | 2.81<br>(0.77) |
| PDI-(CN) <sub>4</sub> -a      | -8.93 | -4.14 | 4.79 | 2.32<br>(0.02) | 2.57<br>(0.06) | 2.79<br>(0.69) | 2.83<br>(0.02) |
| PDI-(CN) <sub>4</sub> -b (d1) | -8.71 | -3.83 | 4.88 | 2.49<br>(0.03) | 2.50<br>(0.06) | 2.65<br>(0.58) | 2.75<br>(0.01) |
| PDI-(CN) <sub>4</sub> -b (d2) | -8.87 | -4.08 | 4.79 | 2.37<br>(0.02) | 2.49<br>(0.13) | 2.63<br>(0.01) | 2.67<br>(0.49) |

**Table S6:** Four lowest singlet excite-state energies ( $E_{S_n}, n = 1 - 4$ ) with the major contribution from occupied  $\rightarrow$  unoccupied FMOs replacement and the charge-transfer number ( $q_{CT}$ ) for all functional PDI dimers calculated in the gas-phase using OT-RSH and also in the condensed-phase using OT-SRSH+PCM with 6-311G (d, p) basis set for all atoms. Oscillator strengths are listed within the bracket. H and L represent HOMO and HOMO, respectively. All energies are in eV.

| PDI Dimers                    | Ex. State | Gas-Phase (OT-RSH) |                                                             |                    | Condensed-Phase (OT-SRSH+PCM) |                                                             |                    |
|-------------------------------|-----------|--------------------|-------------------------------------------------------------|--------------------|-------------------------------|-------------------------------------------------------------|--------------------|
|                               |           | $S_n$              | $E_{S_n}$ (eV)                                              | Major Contribution | $q_{CT}$                      | $E_{S_n}$ (eV)                                              | Major Contribution |
| Pristine-PDI                  | $S_1$     | 2.39<br>(0.02)     | H $\rightarrow$ L (0.70)                                    | 0.39               | 2.04<br>(0.02)                | H $\rightarrow$ L (0.70)                                    | 0.65               |
|                               | $S_2$     | 2.61<br>(0.05)     | H $\rightarrow$ L+1 (0.60);<br>H-1 $\rightarrow$ L (0.37)   | 0.92               | 2.16<br>(0.02)                | H $\rightarrow$ L+1 (0.56);<br>H-1 $\rightarrow$ L (0.43)   | 0.95               |
|                               | $S_3$     | 2.77<br>(0.03)     | H-1 $\rightarrow$ L+1 (0.70)                                | 0.61               | 2.42<br>(0.07)                | H-1 $\rightarrow$ L+1 (0.70)                                | 0.35               |
|                               | $S_4$     | 2.81<br>(0.86)     | H-1 $\rightarrow$ L (0.59);<br>H $\rightarrow$ L+1 (0.37)   | 0.07               | 2.45<br>(1.42)                | H-1 $\rightarrow$ L (0.56);<br>H $\rightarrow$ L+1 (0.43)   | 0.05               |
| PDI-(CN) <sub>2</sub> -a (d1) | $S_1$     | 2.41<br>(0.02)     | H $\rightarrow$ L (0.63)                                    | 0.53               | 2.09<br>(0.02)                | H $\rightarrow$ L (0.66)                                    | 0.84               |
|                               | $S_2$     | 2.53<br>(0.04)     | H $\rightarrow$ L+1 (0.47);<br>H-1 $\rightarrow$ L (0.43)   | 0.52               | 2.16<br>(0.04)                | H $\rightarrow$ L+1 (0.59);<br>H-1 $\rightarrow$ L+1 (0.34) | 0.85               |
|                               | $S_3$     | 2.67<br>(0.21)     | H-1 $\rightarrow$ L+1 (0.45);<br>H-1 $\rightarrow$ L (0.40) | 0.63               | 2.30<br>(0.06)                | H-1 $\rightarrow$ L+1 (0.49);<br>H-1 $\rightarrow$ L (0.47) | 0.23               |

|                                   |       |                |                                                                                        |      |                |                                                             |      |
|-----------------------------------|-------|----------------|----------------------------------------------------------------------------------------|------|----------------|-------------------------------------------------------------|------|
|                                   | $S_4$ | 2.74<br>(0.50) | H-1 $\rightarrow$ L+1 (0.53);<br>H-1 $\rightarrow$ L (0.36)                            | 0.30 | 2.40<br>(1.12) | H-1 $\rightarrow$ L (0.44);<br>H-1 $\rightarrow$ L+1 (0.38) | 0.07 |
| PDI-(CN) <sub>2</sub> -a<br>(d2)  | $S_1$ | 2.26<br>(0.04) | H $\rightarrow$ L (0.70)                                                               | 0.45 | 1.94<br>(0.04) | H $\rightarrow$ L (0.70)                                    | 0.60 |
|                                   | $S_2$ | 2.54<br>(0.10) | H $\rightarrow$ L+1 (0.66)                                                             | 0.81 | 2.14<br>(0.07) | H $\rightarrow$ L+1 (0.61);<br>H-1 $\rightarrow$ L (0.35)   | 0.91 |
|                                   | $S_3$ | 2.71<br>(0.49) | H-1 $\rightarrow$ L (0.65)                                                             | 0.18 | 2.40<br>(0.93) | H-1 $\rightarrow$ L (0.61);<br>H $\rightarrow$ L+1 (0.35)   | 0.10 |
|                                   | $S_4$ | 2.82<br>(0.07) | H-1 $\rightarrow$ L+1 (0.70)                                                           | 0.55 | 2.50<br>(0.14) | H-1 $\rightarrow$ L+1 (0.70)                                | 0.40 |
| PDI-(CN) <sub>2</sub> -<br>b (d1) | $S_1$ | 2.32<br>(0.02) | H $\rightarrow$ L (0.70)                                                               | 0.45 | 1.97<br>(0.03) | H $\rightarrow$ L (0.70)                                    | 0.61 |
|                                   | $S_2$ | 2.58<br>(0.07) | H $\rightarrow$ L+1 (0.62);<br>H-1 $\rightarrow$ L (0.33)                              | 0.88 | 2.15<br>(0.04) | H $\rightarrow$ L+1 (0.58);<br>H-1 $\rightarrow$ L (0.40)   | 0.94 |
|                                   | $S_3$ | 2.80<br>(0.72) | H-1 $\rightarrow$ L (0.61);<br>H $\rightarrow$ L+1 (0.32)                              | 0.13 | 2.43<br>(1.28) | H-1 $\rightarrow$ L (0.58);<br>H $\rightarrow$ L+1 (0.40)   | 0.06 |
|                                   | $S_4$ | 2.82<br>(0.05) | H-1 $\rightarrow$ L+1 (0.69)                                                           | 0.53 | 2.49<br>(0.07) | H-1 $\rightarrow$ L+1 (0.70)                                | 0.38 |
| PDI-(CN) <sub>2</sub> -<br>b (d2) | $S_1$ | 2.43<br>(0.02) | H $\rightarrow$ L (0.70)                                                               | 0.40 | 2.08<br>(0.01) | H $\rightarrow$ L (0.69)                                    | 0.70 |
|                                   | $S_2$ | 2.57<br>(0.07) | H $\rightarrow$ L+1 (0.62);<br>H-1 $\rightarrow$ L (0.32)                              | 0.89 | 2.15<br>(0.05) | H $\rightarrow$ L+1 (0.59);<br>H-1 $\rightarrow$ L (0.39)   | 0.93 |
|                                   | $S_3$ | 2.69<br>(0.02) | H-1 $\rightarrow$ L+1 (0.70)                                                           | 0.59 | 2.37<br>(0.05) | H-1 $\rightarrow$ L+1 (0.69)                                | 0.30 |
|                                   | $S_4$ | 2.81<br>(0.77) | H-1 $\rightarrow$ L (0.62);<br>H $\rightarrow$ L+1 (0.32)                              | 0.11 | 2.44<br>(1.30) | H-1 $\rightarrow$ L (0.59);<br>H $\rightarrow$ L+1 (0.39)   | 0.06 |
| PDI-(CN) <sub>4</sub> -a          | $S_1$ | 2.32<br>(0.02) | H $\rightarrow$ L (0.70)                                                               | 0.46 | 1.99<br>(0.02) | H $\rightarrow$ L (0.70)                                    | 0.61 |
|                                   | $S_2$ | 2.57<br>(0.06) | H $\rightarrow$ L+1 (0.61);<br>H-1 $\rightarrow$ L (0.34)                              | 0.90 | 2.19<br>(0.03) | H $\rightarrow$ L+1 (0.57);<br>H-1 $\rightarrow$ L (0.42)   | 0.95 |
|                                   | $S_3$ | 2.79<br>(0.69) | H-1 $\rightarrow$ L (0.61);<br>H $\rightarrow$ L+1 (0.34)                              | 0.10 | 2.45<br>(1.21) | H-1 $\rightarrow$ L (0.57);<br>H $\rightarrow$ L+1 (0.41)   | 0.05 |
|                                   | $S_4$ | 2.83<br>(0.02) | H-1 $\rightarrow$ L+1 (0.70)                                                           | 0.54 | 2.52<br>(0.06) | H-1 $\rightarrow$ L+1 (0.70)                                | 0.39 |
| PDI-(CN) <sub>4</sub> -<br>b (d1) | $S_1$ | 2.49<br>(0.03) | H $\rightarrow$ L+1 (0.47);<br>H $\rightarrow$ L (0.40);<br>H-1 $\rightarrow$ L (0.32) | 0.50 | 2.12<br>(0.00) | H $\rightarrow$ L (0.66)                                    | 0.96 |
|                                   | $S_2$ | 2.50<br>(0.06) | H $\rightarrow$ L (0.57);<br>H $\rightarrow$ L+1 (0.32)                                | 0.48 | 2.24<br>(0.04) | H-1 $\rightarrow$ L+1 (0.66)                                | 0.79 |
|                                   | $S_3$ | 2.65<br>(0.58) | H-1 $\rightarrow$ L (0.55);<br>H $\rightarrow$ L+1 (0.41)                              | 0.03 | 2.27<br>(0.19) | H $\rightarrow$ L+1 (0.54);<br>H-1 $\rightarrow$ L (0.35)   | 0.21 |
|                                   | $S_4$ | 2.75<br>(0.01) | H-1 $\rightarrow$ L+1 (0.67)                                                           | 0.95 | 2.36<br>(0.92) | H-1 $\rightarrow$ L (0.61);<br>H $\rightarrow$ L+1 (0.31)   | 0.04 |
| PDI-(CN) <sub>4</sub> -<br>b (d2) | $S_1$ | 2.37<br>(0.02) | H $\rightarrow$ L (0.70)                                                               | 0.39 | 2.08<br>(0.02) | H $\rightarrow$ L (0.69)                                    | 0.68 |
|                                   | $S_2$ | 2.49<br>(0.13) | H-1 $\rightarrow$ L (0.66)                                                             | 0.77 | 2.13<br>(0.10) | H-1 $\rightarrow$ L (0.63);<br>H $\rightarrow$ L+1 (0.32)   | 0.87 |
|                                   | $S_3$ | 2.63<br>(0.01) | H-1 $\rightarrow$ L+1 (0.70)                                                           | 0.61 | 2.35<br>(0.05) | H-1 $\rightarrow$ L+1 (0.69)                                | 0.32 |

|  |       |                |                            |      |                |                                                           |      |
|--|-------|----------------|----------------------------|------|----------------|-----------------------------------------------------------|------|
|  | $S_4$ | 2.67<br>(0.49) | H $\rightarrow$ L+1 (0.66) | 0.22 | 2.37<br>(0.93) | H $\rightarrow$ L+1 (0.63);<br>H-1 $\rightarrow$ L (0.32) | 0.13 |
|--|-------|----------------|----------------------------|------|----------------|-----------------------------------------------------------|------|

**Table S7:** Singlet excited-state energies for the  $S_1$  and intense one (in eV) of all PDI dimers calculated using OT-RSH, OT-SRSH and OT-SRSH+PCM methods with 6-311G (d, p) basis set for all atoms.

| Dimers                        | OT-RSH         |                | OT-SRSH        |                | OT-SRSH+PCM    |                |
|-------------------------------|----------------|----------------|----------------|----------------|----------------|----------------|
|                               | $S_1$          | Intense        | $S_1$          | Intense        | $S_1$          | Intense        |
| Pristine-PDI                  | 2.39<br>(0.02) | 2.81<br>(0.86) | 2.07<br>(0.01) | 2.64<br>(0.81) | 2.04<br>(0.02) | 2.45<br>(1.42) |
| PDI-(CN) <sub>2</sub> -a (d1) | 2.41<br>(0.02) | 2.73<br>(0.49) | 2.04<br>(0.00) | 2.55<br>(0.64) | 2.09<br>(0.02) | 2.40<br>(1.12) |
| PDI-(CN) <sub>2</sub> -a (d2) | 2.26<br>(0.04) | 2.71<br>(0.49) | 1.97<br>(0.02) | 2.53<br>(0.52) | 1.94<br>(0.04) | 2.40<br>(0.93) |
| PDI-(CN) <sub>2</sub> -b (d1) | 2.32<br>(0.02) | 2.80<br>(0.72) | 2.02<br>(0.01) | 2.63<br>(0.71) | 1.97<br>(0.03) | 2.43<br>(1.27) |
| PDI-(CN) <sub>2</sub> -b (d2) | 2.43<br>(0.02) | 2.81<br>(0.77) | 2.12<br>(0.01) | 2.63<br>(0.74) | 2.08<br>(0.01) | 2.44<br>(1.30) |
| PDI-(CN) <sub>4</sub> -a      | 2.32<br>(0.02) | 2.79<br>(0.69) | 2.05<br>(0.01) | 2.63<br>(0.66) | 1.99<br>(0.02) | 2.45<br>(1.21) |
| PDI-(CN) <sub>4</sub> -b (d1) | 2.49<br>(0.03) | 2.65<br>(0.58) | 2.05<br>(0.00) | 2.48<br>(0.53) | 2.12<br>(0.00) | 2.36<br>(0.92) |
| PDI-(CN) <sub>4</sub> -b (d2) | 2.37<br>(0.02) | 2.49<br>(0.13) | 2.10<br>(0.01) | 2.49<br>(0.53) | 2.07<br>(0.02) | 2.37<br>(0.93) |

**Table S8:** The internal electron ( $\lambda_e$ ) and the hole reorganization ( $\lambda_h$ ) energies from Nelsen's four-point adiabatic potential (AP) method and also from normal modes (NM) analysis for pristine and cyano-substituted PDIs calculated using  $\omega$ B97X-D. Relaxation energy contributions from the ground (neutral) state ( $\lambda_{e/h}^{gs}$ ) and the excited charged (cationic/anionic) state ( $\lambda_{e/h}^{es}$ ) potential energy surfaces to the total internal reorganization energy ( $\lambda_i$ ) are also given in meV unit. Gas-phase values are also provided within the bracket.

| Systems                  | $\lambda_e^{gs}$ | $\lambda_e^{es}$ | $\lambda_e$ (AP) | $\lambda_e$ (NM) | $\lambda_h^{gs}$ | $\lambda_h^{es}$ | $\lambda_h$ (AP) | $\lambda_h$ (NM) |
|--------------------------|------------------|------------------|------------------|------------------|------------------|------------------|------------------|------------------|
| Pristine-PDI             | 189<br>(202)     | 187<br>(202)     | 376<br>(404)     | 382<br>(408)     | 109<br>(125)     | 109<br>(122)     | 218<br>(247)     | 221<br>(253)     |
| PDI-(CN) <sub>2</sub> -a | 175<br>(189)     | 176<br>(190)     | 351<br>(379)     | 348<br>(374)     | 118<br>(131)     | 117<br>(129)     | 235<br>(260)     | 240<br>(265)     |
| PDI-(CN) <sub>2</sub> -b | 177<br>(189)     | 175<br>(187)     | 352<br>(376)     | 359<br>(380)     | 108<br>(120)     | 108<br>(119)     | 216<br>(239)     | 221<br>(245)     |

|                          |              |              |              |              |              |              |              |              |
|--------------------------|--------------|--------------|--------------|--------------|--------------|--------------|--------------|--------------|
| PDI-(CN) <sub>4</sub> -a | 169<br>(177) | 167<br>(176) | 336<br>(353) | 348<br>(360) | 108<br>(117) | 107<br>(116) | 215<br>(233) | 219<br>(237) |
| PDI-(CN) <sub>4</sub> -b | 173<br>(185) | 173<br>(184) | 346<br>(369) | 350<br>(375) | 118<br>(127) | 116<br>(126) | 234<br>(253) | 244<br>(261) |

**Table S9:** The internal electron ( $\lambda_e$ ) and the hole reorganization ( $\lambda_h$ ) energies from Nelsen's four-point adiabatic potential (AP) method for pristine and cyano-substituted PDIs calculated using B3LYP-D. Relaxation energy contributions from the ground (neutral) state ( $\lambda_{e/h}^{gs}$ ) and the excited charged (cationic/anionic) state ( $\lambda_{e/h}^{es}$ ) potential energy surfaces to the total internal reorganization energy ( $\lambda_i$ ) are also given in meV unit. Gas-phase values are also provided within the bracket.

| Systems                  | $\lambda_e^{gs}$ | $\lambda_e^{es}$ | $\lambda_e$ (AP) | $\lambda_h^{gs}$ | $\lambda_h^{es}$ | $\lambda_h$ (AP) |
|--------------------------|------------------|------------------|------------------|------------------|------------------|------------------|
| Pristine-PDI             | 119 (129)        | 120 (133)        | 239 (262)        | 68 (79)          | 67 (78)          | 135 (157)        |
| PDI-(CN) <sub>2</sub> -a | 112 (123)        | 115 (127)        | 227 (250)        | 69 (80)          | 69 (79)          | 138 (159)        |
| PDI-(CN) <sub>2</sub> -b | 107 (118)        | 108(119)         | 215 (237)        | 66 (74)          | 66 (74)          | 132 (148)        |
| PDI-(CN) <sub>4</sub> -a | 100 (108)        | 100 (109)        | 200 (217)        | 65 (70)          | 65 (70)          | 130 (140)        |
| PDI-(CN) <sub>4</sub> -b | 109 (119)        | 110 (121)        | 219 (240)        | 69 (76)          | 68 (75)          | 137 (151)        |

**Table S10:** Marcus charge transfer rates for the electron ( $k_e$ ) and the hole ( $k_h$ ) transfer calculated at the room temperature (T = 298 K) for all PDIs considered in the present study adopting the internal reorganization energy  $\lambda_i$  (left) and also the total reorganization energy  $\lambda = \lambda_i + \lambda_o$  (right).

| $\pi$ -Stacked Dimers         | Marcus Rate (s <sup>-1</sup> )<br>with $\lambda = \lambda_i$ |                       | Marcus Rate (s <sup>-1</sup> )<br>with $\lambda = \lambda_i + \lambda_o$ |                       |
|-------------------------------|--------------------------------------------------------------|-----------------------|--------------------------------------------------------------------------|-----------------------|
|                               | $k_e$                                                        | $k_h$                 | $k_e$                                                                    | $k_h$                 |
| Pristine-PDI                  | $2.37 \times 10^{12}$                                        | $6.10 \times 10^{13}$ | $2.12 \times 10^{12}$                                                    | $5.41 \times 10^{13}$ |
| PDI-(CN) <sub>2</sub> -a (d1) | $8.37 \times 10^7$                                           | $2.19 \times 10^{13}$ | $7.49 \times 10^7$                                                       | $1.95 \times 10^{13}$ |
| PDI-(CN) <sub>2</sub> -a (d2) | $1.03 \times 10^{13}$                                        | $1.32 \times 10^{14}$ | $9.18 \times 10^{12}$                                                    | $1.18 \times 10^{14}$ |
| PDI-(CN) <sub>2</sub> -b (d1) | $7.45 \times 10^{12}$                                        | $1.29 \times 10^{14}$ | $6.67 \times 10^{12}$                                                    | $1.15 \times 10^{14}$ |
| PDI-(CN) <sub>2</sub> -b (d2) | $3.68 \times 10^{11}$                                        | $5.74 \times 10^{13}$ | $3.29 \times 10^{11}$                                                    | $5.09 \times 10^{13}$ |
| PDI-(CN) <sub>4</sub> -a      | $1.01 \times 10^{13}$                                        | $1.29 \times 10^{14}$ | $9.07 \times 10^{12}$                                                    | $1.15 \times 10^{14}$ |
| PDI-(CN) <sub>4</sub> -b (d1) | $3.93 \times 10^{11}$                                        | $1.74 \times 10^{11}$ | $3.52 \times 10^{11}$                                                    | $1.55 \times 10^{11}$ |
| PDI-(CN) <sub>4</sub> -b (d2) | $2.24 \times 10^{13}$                                        | $6.58 \times 10^{12}$ | $2.01 \times 10^{13}$                                                    | $5.85 \times 10^{12}$ |

**Table S11:** Calculated electron ( $\mu_e$ ) and hole ( $\mu_h$ ) mobilities obtained at room temperature (T = 298 K) for all PDIs studied here adopting the internal reorganization energy  $\lambda_i$  (left) and also with the total reorganization energy  $\lambda$  (right).

| $\pi$ -Stacked Dimers         | Carriers Mobility<br>with $\lambda = \lambda_i$<br>[cm <sup>2</sup> /(V-s)] |                       | Carriers Mobility<br>with $\lambda = \lambda_i + \lambda_o$<br>[cm <sup>2</sup> /(V-s)] |         |
|-------------------------------|-----------------------------------------------------------------------------|-----------------------|-----------------------------------------------------------------------------------------|---------|
|                               | $\mu_e$                                                                     | $\mu_h$               | $\mu_e$                                                                                 | $\mu_h$ |
| Pristine-PDI                  | 0.10                                                                        | 2.70                  | 0.09                                                                                    | 2.39    |
| PDI-(CN) <sub>2</sub> -a (d1) | $3.84 \times 10^{-6}$                                                       | 1.01                  | $3.43 \times 10^{-6}$                                                                   | 0.89    |
| PDI-(CN) <sub>2</sub> -a (d2) | 0.47                                                                        | 6.14                  | 0.43                                                                                    | 5.45    |
| PDI-(CN) <sub>2</sub> -b (d1) | 0.33                                                                        | 5.67                  | 0.29                                                                                    | 5.03    |
| PDI-(CN) <sub>2</sub> -b (d2) | $1.66 \times 10^{-2}$                                                       | 2.58                  | $1.48 \times 10^{-2}$                                                                   | 2.29    |
| PDI-(CN) <sub>4</sub> -a      | 0.44                                                                        | 5.61                  | 0.39                                                                                    | 4.97    |
| PDI-(CN) <sub>4</sub> -b (d1) | $2.68 \times 10^{-2}$                                                       | $1.19 \times 10^{-2}$ | $2.39 \times 10^{-2}$                                                                   | 0.01    |
| PDI-(CN) <sub>4</sub> -b (d2) | 1.18                                                                        | 0.35                  | 1.05                                                                                    | 0.31    |

**Table S12:** Marcus charge transfer rates ( $k_{e/h}$ ) and the electron ( $\mu_e$ ) and the hole ( $\mu_h$ ) mobilities calculated at room temperature (T = 298 K) for the fully optimized PDI and also the slipped stacked (ss-PDI) and the rotated sandwich (rs-PDI) dimer structures extracted from two different crystal structures considered in the present study. Charge hopping distance ( $r$ ), electronic coupling ( $V$ ) and internal reorganization energies ( $\lambda_i$ ) for each dimer are also listed. Rates and charge mobilities listed within the bracket are calculated using the total reorganization energy ( $\lambda$ ).

| Dimer  | $r$<br>(Å) | $\lambda_i$<br>(meV) |             | $V$<br>(meV) |       | Marcus Rate<br>(s <sup>-1</sup> )                  |                                                    | Mobility<br>(cm <sup>2</sup> /V.s) |                  |
|--------|------------|----------------------|-------------|--------------|-------|----------------------------------------------------|----------------------------------------------------|------------------------------------|------------------|
|        |            | $\lambda_e$          | $\lambda_h$ | $V_e$        | $V_h$ | $k_e$                                              | $k_h$                                              | $\mu_e$                            | $\mu_h$          |
| PDI    | 3.37       | 376                  | 218         | 58           | 119   | $2.4 \times 10^{12}$<br>( $2.1 \times 10^{12}$ )   | $6.1 \times 10^{13}$<br>( $5.4 \times 10^{13}$ )   | 0.10<br>(0.09)                     | 2.7<br>(2.39)    |
| ss-PDI | 4.68       | 376                  | 218         | 40           | 186   | $1.13 \times 10^{12}$<br>( $1.01 \times 10^{12}$ ) | $1.49 \times 10^{14}$<br>( $1.32 \times 10^{14}$ ) | 0.10<br>(0.09)                     | 12.72<br>(11.28) |
| rs-PDI | 3.66       | 376                  | 218         | 109          | 95    | $8.37 \times 10^{12}$<br>( $7.50 \times 10^{12}$ ) | $3.89 \times 10^{13}$<br>( $3.45 \times 10^{13}$ ) | 0.44<br>(0.39)                     | 2.03<br>(1.80)   |

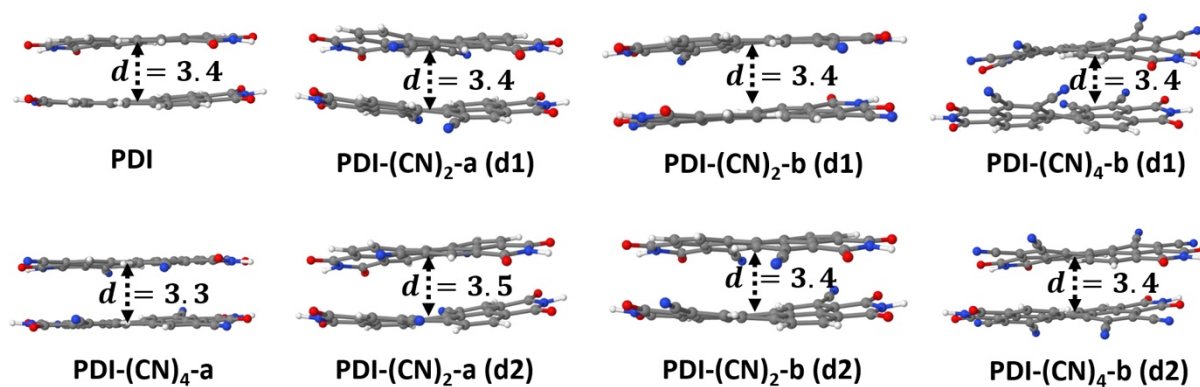

**Figure S1:** Side-view of all PDI dimer geometries optimized at  $\omega$ B97X-D/6-311G (d, p) level of theory. H, C, N and O are indicated by white, grey, blue and red colour balls, respectively. Stacking distances ( $d$ ) are also listed in Å.

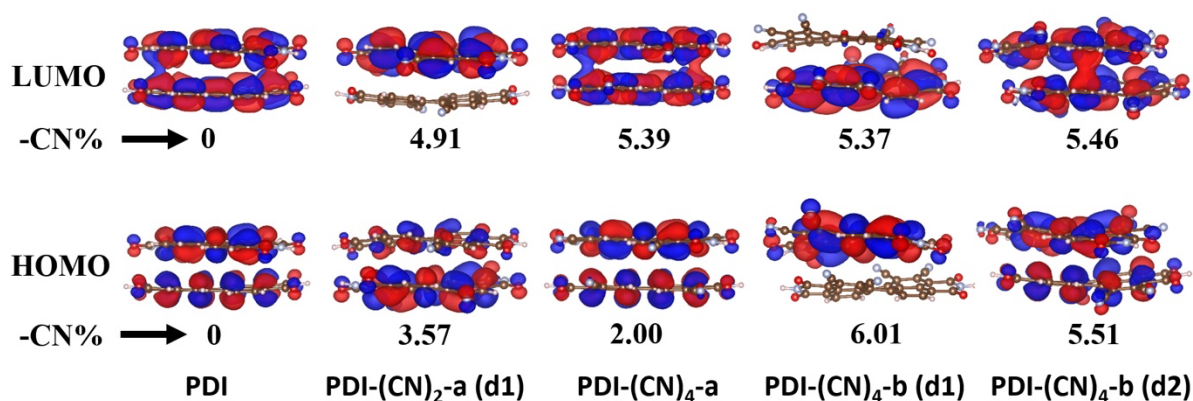

**Figure S2:** HOMO and LUMO iso-surfaces for the pristine PDI and also for a few functional PDIs calculated using OT-RSH functional in the gas-phase. An iso-value of  $0.02 \text{ e}/\text{\AA}^3$  is used. Percentage of -CN group contributions to the HOMO and the LUMO are also listed.
